# Supplementary material for: LOC689986, a unique gene showing specific expression in restricted areas of the rodent neocortex
Source: PubMed Central journal article supplement (PMC3717020; doi:10.1186/1471-2202-14-68), 2013-07-11

Additional file 2

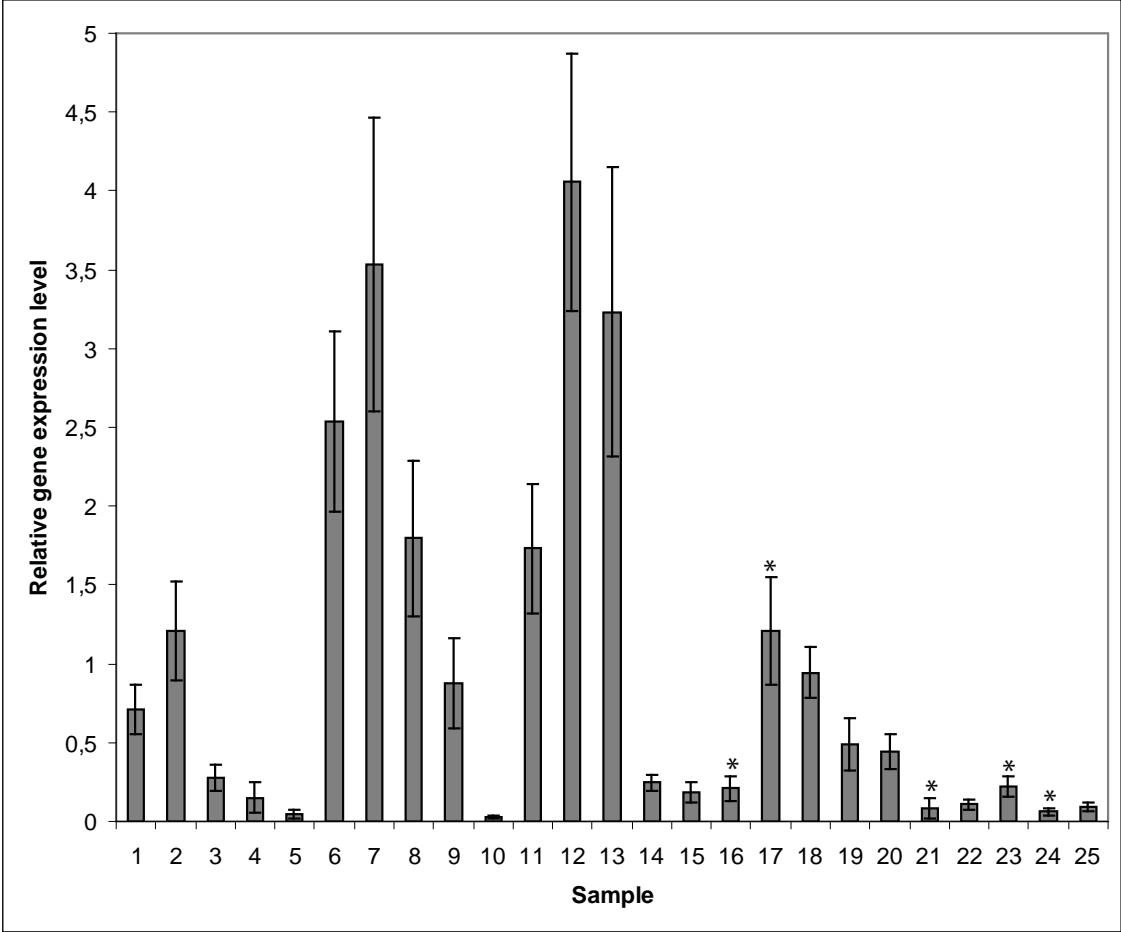

Supplement: 1471-2202-14-68-S2.pdf [file 1471-2202-14-68-S2.pdf]
