# Supplementary material for: LOC689986, a unique gene showing specific expression in restricted areas of the rodent neocortex
Source: PubMed Central journal article supplement (PMC3717020; doi:10.1186/1471-2202-14-68), 2013-07-11
Supplement: 1471-2202-14-68-S4.pdf [file 1471-2202-14-68-S4.pdf]

## Additional file 4

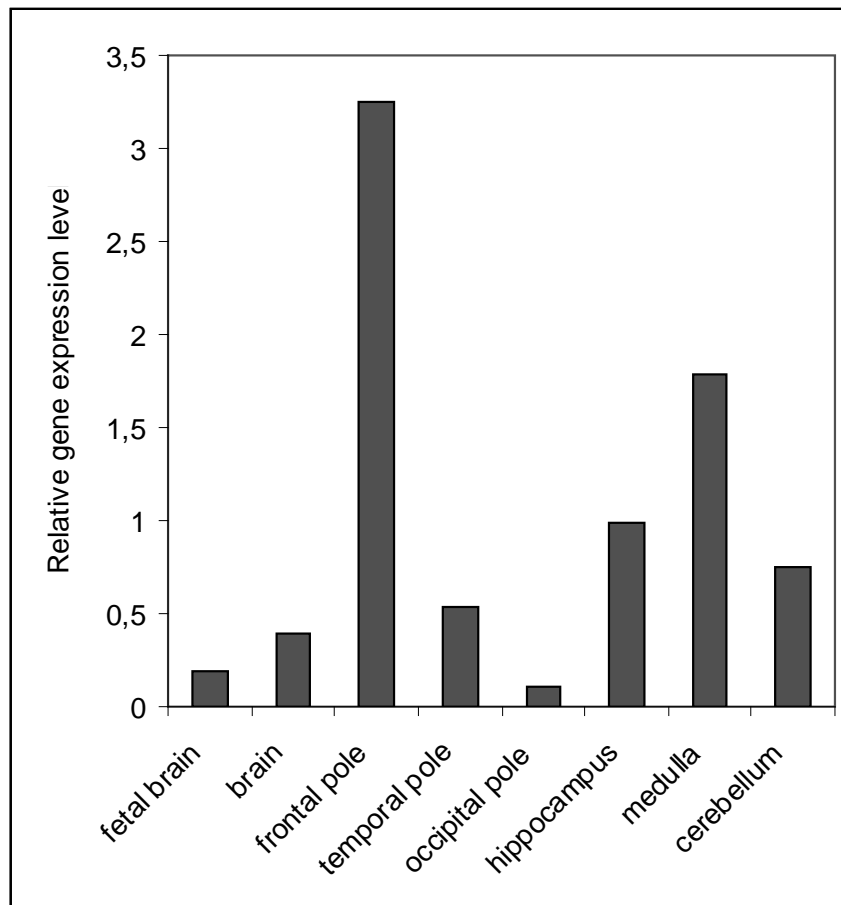

| Sample         | Ct Mean values  |             |
|----------------|-----------------|-------------|
|                | <i>C1orf146</i> | <i>ARBP</i> |
| fetal brain    | 36,1            | 20,5        |
| brain          | 36,9            | 22,3        |
| frontal pole   | 34,5            | 23,0        |
| temporal pole  | 37,5            | 23,4        |
| occipital pole | 39,8            | 23,3        |
| hippocampus    | 36,5            | 23,3        |
| medulla        | 35,8            | 23,5        |
| cerebellum     | 36,2            | 22,6        |
